# **Prolonged lag time results in small colony variants and reflects a sub-population of persisters *in vivo***

Clément Vulin<sup>a,b,1</sup>, Nadja Leimer<sup>c,d,1</sup>, Markus Huemer<sup>c,1</sup>, Martin Ackermann<sup>a,b,2</sup>, Annelies S. Zinkernagel<sup>c,2</sup>

<sup>a</sup> Institute of Biogeochemistry and Pollutant Dynamics, ETH Zurich, Zurich, Switzerland

<sup>b</sup> Department of Environmental Microbiology, Eawag, Dübendorf, Switzerland

<sup>c</sup> Division of Infectious Diseases and Hospital Epidemiology, University Hospital Zurich, University of Zurich, Zurich, Switzerland

<sup>d</sup> Present address: Antimicrobial Discovery Center, Department of Biology, Northeastern University, Boston, MA, 02115, USA.

<sup>1</sup> CV, NL and MH contributed equally to this work

<sup>2</sup> MA and AZ contributed equally to this work

## Abstract:

Treatment failure and recurrent infections can occur even when patients are treated with antibiotics to which bacteria are susceptible. These treatment failures could be due to a sub-population of bacteria persisting through the treatment. In this study, we tested the hypothesis that such bacterial persisters manifest in clinical samples as small colony variants (SCVs). We worked with the bacterial pathogen *Staphylococcus aureus*, where SCVs are frequently observed in clinics. The small size of SCV-colonies is often considered to be the result of mutations that reduce the bacterial growth rate. Alternatively, it is possible that the small colony size could result from a long lag time of bacteria in plated samples. We used automated plate imaging and single-cell microscopy to precisely quantify growth kinetics of bacteria sampled from patient and mice abscesses, and from low-pH *in vitro* cultures mimicking the host. Under these conditions, the small colony size was the consequence of a long lag time and was associated with tolerance towards antibiotics. We found that bacteria with a long lag time emerged *de novo* during the growth phase in the murine abscess as well as in the low-pH *in vitro* cultures, and that their proportion increased during stationary phase. Antibiotic exposure further increased the proportion of bacteria with a long lag time. Thus, the persisters found in low-pH host compartments could be a cause of treatment failure, and antibiotic treatment potentially aggravates the problem. These insights call for antibiotic treatment strategies that explicitly address the problem of persister formation.

## Keywords:

Persisters; *Staphylococcus aureus*; antibiotic tolerance; small colony variants; lag time

## Significance Statement:

Bacterial pathogens often contain subpopulations that are multidrug tolerant and metabolically inactive. These subpopulations are known as persisters and are hypothesised to be linked to treatment failure and recurrent infections even in bacteria that are not genetically resistant to antibiotics. Identifying persisters in clinical samples remains a challenge due to their metabolically active state. Here, we used time-lapse plate imaging and single cell microscopy to link the presence of persisters to the nonstable small colony variant (SCV) phenotype that is observed in some *Staphylococcus aureus* infections. These findings may help to identify treatment regimens that prevent or address the emergence of persistence and thus to reduce relapses.

## Introduction

Bacterial infections continue to be a major health threat despite the availability of antibiotics. Antibiotic treatment often fails because bacteria are genetically resistant to antibiotics. However, even among genetically susceptible bacteria, there are phenotypic subpopulations that tolerate antibiotics and survive treatment. These subpopulations, often referred to as persisters (1–3), are growth arrested bacteria, and the growth arrest confers tolerance towards antibiotics. In clinics these persisters may resume growth and result in recurrent bacterial infections. Thus, by alternating between non-growing and growing states fully antibiotic susceptible bacteria may cause chronic and recurrent infections despite the use of antibiotics that are effective *in vitro*.

Persisters are found in various bacterial species including *Staphylococcus aureus*, *Mycobacterium tuberculosis*, *Escherichia coli*, *Salmonella Typhimurium* and *Pseudomonas ssp.* and are understood to be linked to clinical persistence (4). We focused our work on *S. aureus*, one of the major causes of both community-associated and health care-associated infections. This Gram-positive bacterium is of concern due to its propensity to cause chronic and relapsing infections including osteomyelitis, endocarditis and recurrent abscesses (5–8). In addition, *S. aureus* infections can relapse after long asymptomatic periods. When sampled from various body sites such as bones and joints, the respiratory and urinary tracts (9, 10) and grown on solid agar plates, *S. aureus* sometimes shows marked variation in colony sizes: i.e. some colonies are much smaller than most others from the same sample. These small colonies are referred to as small colony variants (SCVs). More precisely, SCVs

are defined as colonies whose size is 5 or 10 times (11) smaller than the most common colony type.

Most SCVs recovered *in vitro* and from murine infection models revert to a normal sized colony upon sub-cultivation (12) and are consequently termed nonstable SCVs. Within a population, these nonstable SCVs usually occur at a low frequency, which increases after exposure to the host intracellular milieu or after exposure to distinct stress conditions, such as acidic pH (12–18) (for *Salmonella enterica*, see (19)). Due to their propensity to revert, it is difficult to enrich cultures in nonstable SCVs or to study them in a pure, homogeneous population. This renders their characterization challenging. Therefore, most studies have used stable SCVs to investigate the pathophysiology and clinical significance of SCVs (9). In these stable SCVs, the small colony size is the consequence of genetic mutations, and is therefore retained upon sub-cultivation. The mutations that are responsible for the small colony size affect thymidine or hemin biosynthesis and result in defects in the electron transport. As a result, these mutants are less susceptible to antibiotics (20). Here, we focus on nonstable SCVs, i.e. on colonies whose small size is not a consequence of a mutation and is not retained upon sub-cultivation.

Nonstable SCVs and persisters share many important characteristics, including their low frequencies within the population, the ability to revert and an association with chronic infections (21). SCVs and persisters are both frequently found among bacteria recovered from the intracellular milieu or after exposure to stress (14, 19).

Here, we hypothesized that SCVs are the product of persisters and arise from bacteria that were dormant within the host. To address this hypothesis, we 1) quantified the frequency of nonstable SCVs in samples from the human and murine host as well as *in vitro* conditions mimicking host conditions; 2) determined the bacterial growth dynamics that is responsible for the small size of SCV colonies; 3) quantified the dynamics of SCV formation and enrichment *in vitro* and in murine abscesses and 4) investigated whether differences in colony size distribution are predictive for antibiotic susceptibility.

## Results and Discussion

**SCVs are recovered from *in vivo* and *in vitro* samples.** Our first aim was to obtain quantitative information about the frequency of nonstable SCVs recovered from patient and mouse abscesses. We first analyzed the distribution of colony sizes of bacteria directly recovered from a *S. aureus* abscess located in the thigh of a patient. To quantify colony size, we determined the colony radius after 24h of growth. Our quantification showed a distribution of colony sizes with a long tail of smaller colonies, including a small fraction (2.7%) of colonies whose area was five times smaller than the most common colony area, and which therefore qualify as SCV (**Fig. 1A**; for discussion on the use of colony size ratio for SCV determination, see **SI 3**). This contrasted with samples from exponential cultures of the same strain grown in rich bacteria culture medium, which typically did not show any SCVs (typically under 0.2% of the population; **Fig. 1A**). Next, we quantified SCVs in a murine abscess model. We observed a distribution of colony sizes similar to the

distribution in the sample from the patient, with a larger proportion of small colonies (5.1%, **Fig. 1B**).

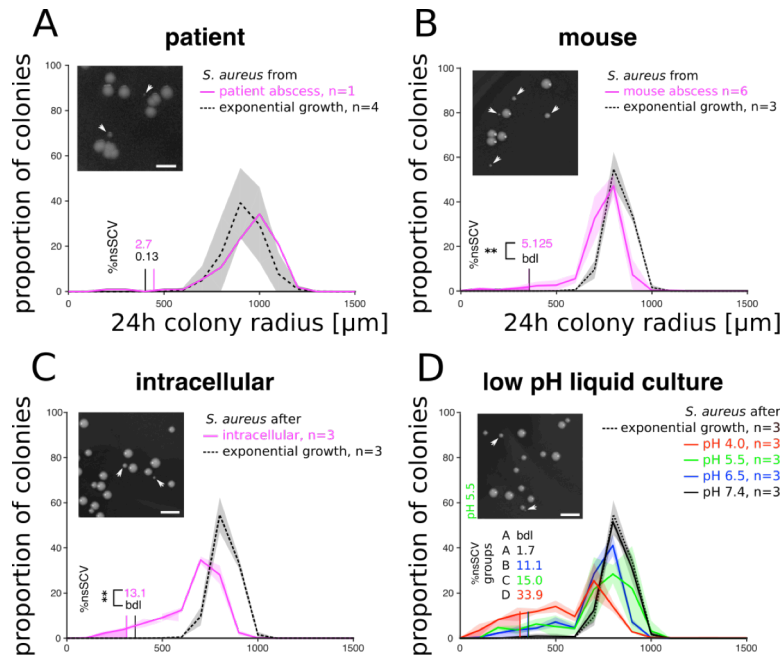

**Figure 1: *S. aureus* recovered from human and murine abscesses displayed heterogeneous colony sizes including a fraction of small colony variants.**

Distribution of colony sizes 24 hours after plating. Bacteria that were sampled directly from abscesses from a patient (**A**) or mouse (**B**, see also SI 4), from eukaryotic A549 cells (**C**) and from liquid cultures grown at different pHs (**D**). Bacteria grown exponentially in complex LB medium served as control (dashed black lines). Shaded areas depict the standard deviation. The colored areas under each curve mark colonies whose area was at least 5 times smaller than the area of the most common colony type, the criterion that is generally used to identify SCVs (the figures depict colony radius instead of colony area, and SCVs would thus be defined as colonies whose radius is at least a factor 2.23, i.e.,  $\sqrt{5}$ , smaller than the radius of the most common colony type). The corresponding frequencies are given above the distributions (labeled as ‘%nsSCV’, ‘bdl’: below detection limit). Insets show representative images of colonies 24 hours after plating. Small colonies are indicated by an arrow. All histograms use a binning of 100  $\mu\text{m}$ . Groups in panel D define homogeneous subsets of SCV fractions; treatments with a different group letter (A-D) show significant differences in the proportion of SCVs (at  $p < 0.05$ , t-test, Bonferroni correction for multiple testing).

Our next goal was to set up a more controlled *in vitro* system where we could recapitulate the emergence of SCVs, and study the underlying growth dynamics in more detail. We and others have previously shown that a fraction of *S. aureus* inside a host reside intracellularly inside lysosomes, which are

commonly accepted to have a pH of around 5.5 (22, 23). In addition, distinct extracellular milieu, such as abscesses, are also acidic (around pH 5.5-7.3 (24–28)). Thus, in the subsequent assays we grew *S. aureus* in liquid cultures at defined acidic and neutral pHs as well as intracellularly in eukaryotic cells. When plating samples from these cultures, we found that low pH induces a shift towards increasing fractions of SCVs, with up to 25% SCV at pH 4 (**Fig. 1C, 1D**), in line with previous work (14). In particular, bacteria sampled from a culture grown at pH 5.5 showed a higher fraction of SCVs compared to bacteria recovered from the murine abscess ( $p < 0.001$ , t-test on SCV proportion), but similar to the intracellular model ( $p = 0.10$ , **Fig. 1B**).

**Nonstable SCVs are due to late appearance time.** We aimed to analyze why SCV colonies are small, that is, to understand the cellular growth traits that determine differences in colony size. The small colony size of SCVs has previously been attributed to slow growth (17, 29). However, in addition to a slow growth rate a small colony size could also be caused by a late initiation of growth or an early cessation of growth compared to larger colonies (**Fig. 2A**). To discriminate between the three scenarios, we used automated imaging to follow colony growth over time (30, 31). In both the murine abscess model (**Fig. 2B**) and the *in vitro* low pH model (**Fig. 2C**), we observed that the small colonies grew at similar rates to the normal sized colonies ( $p = 0.25$ , t-test on initial growth rate, see **SI 2**). The main difference between small and normal-sized colonies was the time at which they were first detected; we refer to this as ‘appearance time’ (see **SI 3**). This contrasts with growth patterns that we observed in stable SCV strains with mutations that render them auxotrophic; these colonies grew at a slow rate (**Fig. 2E**) except if the medium was



supplemented with hemin to complement the auxotrophy. Together, these results suggest that small colony size in the nonstable SCVs might be the consequence of a later initiation of growth.

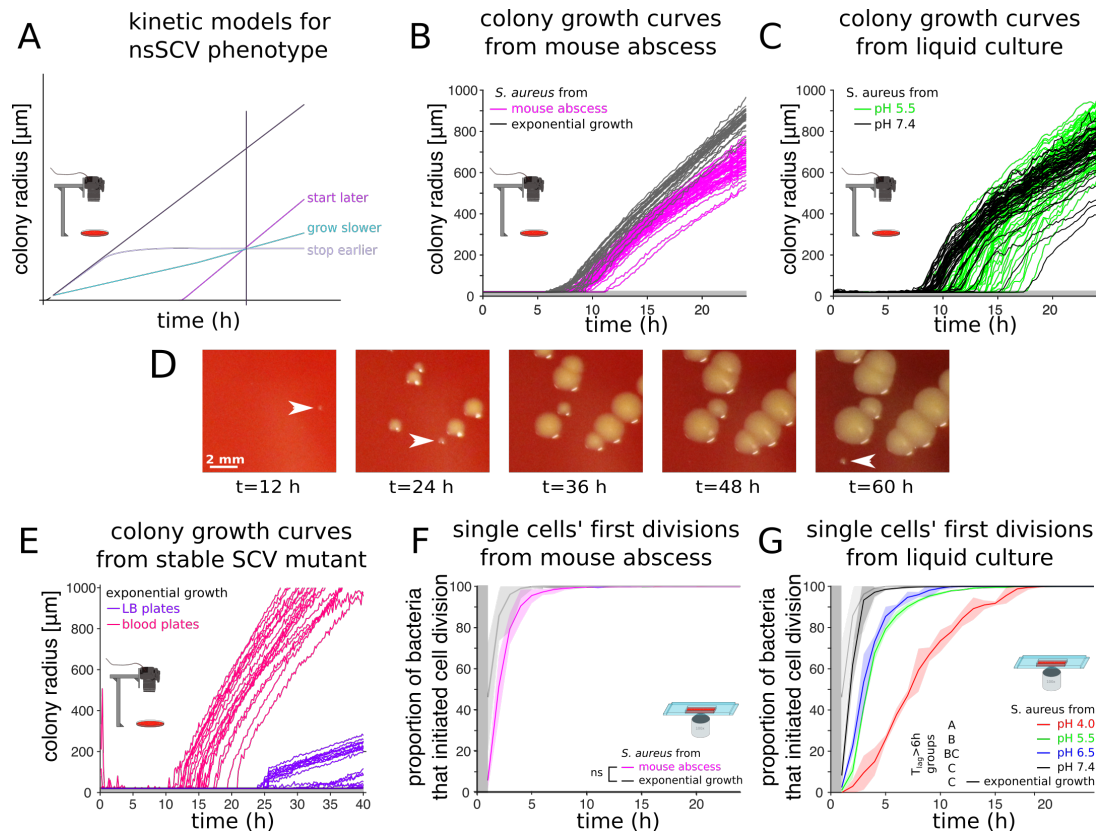

**Figure 2: SCV formation is a consequence of a late emergence of colonies, and is caused by a delay in the first division at the level of single cells.** **A.** Schematic drawing of the three different scenarios that can explain why a colony is small when measured at a specific time point (indicated by a vertical black line; the diagonal black line depicts the growth dynamics of a large colony). **B.** Colony growth of bacteria sampled from murine abscesses and compared to bacteria sampled from an exponentially growing culture. The same number of colonies is represented for each condition ( $n=50$ ). Colonies sampled from the murine abscess tended to emerge later than colonies sampled from the exponentially growing culture. **C.** Colony growth of bacteria sampled from a liquid culture at neutral (pH 7.4) or acidic (pH 5.5) medium after 3 days of incubation. The same number of colonies is represented for each condition ( $n=50$ ). Colonies sampled from pH 5.5 tended to emerge later than colonies sampled from pH 7.4. **D.** Representative images of colonies acquired at different time points after sampling from a liquid acidic culture medium (pH 4.0). Colonies appeared at different time points (arrows) and this resulted in different colony sizes. **E.** Colony growth of the stable SCV strain Cowan *hemB::ermB* on LB agar or on LB agar supplemented with sheep blood. The same number of colonies is represented for each condition ( $n=50$ ). The colonies of this stable SCV strain grew at a markedly lower rate on LB plates as compared to blood plates that complement their auxotrophy. **F.** Cumulative distributions of the time points of the first cell division of bacteria sampled from, a murine abscess model and from an exponentially growing culture determined by automated time-lapse microscopy. The vertical grey area marks the period at the beginning of the experiment where cell divisions could occur but not be observed. **G.** Cumulative distributions of the time points of the first cell division of bacteria sampled from liquid

cultures with different pHs and from an exponentially growing culture at neutral pH. Groups mark homogeneous subsets of the proportion of bacteria with a lag time (time to first division) over 6 hours; treatments with a different group letter are significantly different (at  $p < 0.05$ , t-test, Bonferroni correction for multiple testing).

**Late colony appearance time reflects long lag times.** While these experiments allowed to analyze growth dynamics once colonies had attained a size of 70 micrometers (corresponding to about  $2 \cdot 10^6$  bacteria), they did not allow us to follow colony formation from the first cell division on. We thus complemented this macroscopic analysis with time-lapse microscopy to assess whether the small size of SCV colonies is indeed the consequence of a delay in the initiation of the first cell division. Measurements of the first divisional event in the murine abscess and the *in vitro* models confirmed that the small size of SCV colonies were a consequence of a delayed initiation of cell division of the bacterium that founded the colony (**Fig. 2F** and **2G, SI 2**). A few bacteria started to grow as late as 10 to 20 hours (**Fig. 2D, 2G**) after the first bacteria had divided. The ratio between colonies sizes that is usually used to define SCVs is an approximation, but not an absolute measure of the phenotypic differences between large and small colonies, since this ratio depends for instance on observation time (see **SI 3**). Single-cell lag time is a more robust proxy of the phenotypic differences among bacteria sampled from the different sources analyzed in this study; in the remainder of the manuscript, we will thus refer to SCVs as bacteria with a lag time over 6 hours.

**Bacteria with long lag time are formed *de novo* during exponential growth.**

Our next goal was to better understand how bacteria with a long lag emerge during growth *in vivo* and at a low pH. Both conditions lead to an increase in the proportion of SCVs compared to growth in exponential culture at neutral

pH. A first possibility is that SCV bacteria emerge *de novo* in these conditions (in the sense that some bacteria would switch to a phenotypic state associated with a long lag); a second possibility is that SCV bacteria are already present in the inoculum, and that these bacteria are simply enriched because they have higher survival rates in our *in vitro* and *in vivo* conditions. One simple test for the first scenario, the *de novo* emergence, is to ask whether the total number of SCV bacteria after *in vivo* or *in vitro* treatment ever exceeds the total number of bacteria that were inoculated into these systems; if it does, then this can only be explained by the emergence of SCV bacteria during *in vivo* or *in vitro* growth (possibly in addition to an enrichment through increased survival – the two scenarios are not mutually exclusive).

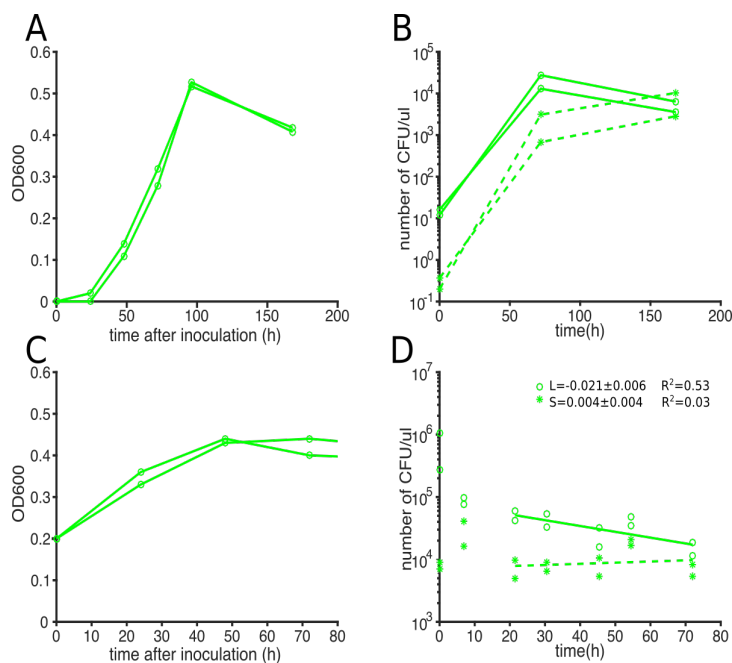

**Figure 3: SCVs are formed during the growth phase and their proportion increases during stationary phase.** **A.** When inoculating a low number of bacteria ( $2 \cdot 10^4$  per milliliter) in acidic media (pH 5.5), the resulting populations continue to grow for about 100 hours. Lines represent changes in optical density over time in two independent replicates. **B.** The lines depict the number of SCVs (i.e., colonies with a lag time of more than 6 hours; dashed lines, stars) and the number of colonies with larger radius (solid lines, open circles) in these cultures. 72 hours after inoculation, the absolute number of SCVs exceeds the total number of bacteria in the initial inoculum, and SCVs were thus formed during the growth phase. **C.** When bacteria were inoculated at higher concentration, stationary phase was reached earlier and at a similar optical density as in the experiments depicted in **A.** We used these growth experiments for

analyzing effects of stationary phase on the frequency of SCVs. **D.** After entering stationary phase, the absolute number of SCVs does not vary substantially over time (stars), while the absolute number of colonies with larger radius decreases (empty circles). As a consequence, the proportion of SCVs increases in the population without increase in absolute numbers. Lines are exponential regression for 2 replicates on the indicated time range (dashed: SCV colonies, solid: non-SCV colonies; the estimated rates (for large colonies, L, and small colonies, S) with standard deviations of the slopes are depicted in the panel).

We found that SCVs indeed emerged *de novo* when culturing bacteria at pH 5.5 *in vitro*: the absolute number of SCVs observed at the end of the growth phase exceeded the total number of bacteria used for inoculation (**Fig. 3B**). This effect was observed before bacterial cultures reached stationary phase, suggesting that stationary phase was not necessary for the emergence of new SCVs. In addition, we observed that enrichment of SCV bacteria also played a role: when we followed our *in vitro* cultures into stationary phase, we observed that the overall number of bacteria that were able to form a colony decreased over time. However, this decrease was much less pronounced among the SCV bacteria than among the other bacteria (see **Fig. 3D**), meaning that SCVs were enriched during stationary phase. In the murine abscess model, the total number of SCV colonies obtained from the abscess exceeded the total number of SCVs injected (see **SI 4**), again in line with the notion that SCV colonies emerged *de novo* during the infection. In conclusion, our results suggest that during abscess formation in the murine system, as well as in our *in vitro* model that mimicks growth in the host, bacteria switch to a state where they will form a small colony upon plating. The bacteria in this state will be further enriched during the stationary phase when bacteria die or become unculturable.

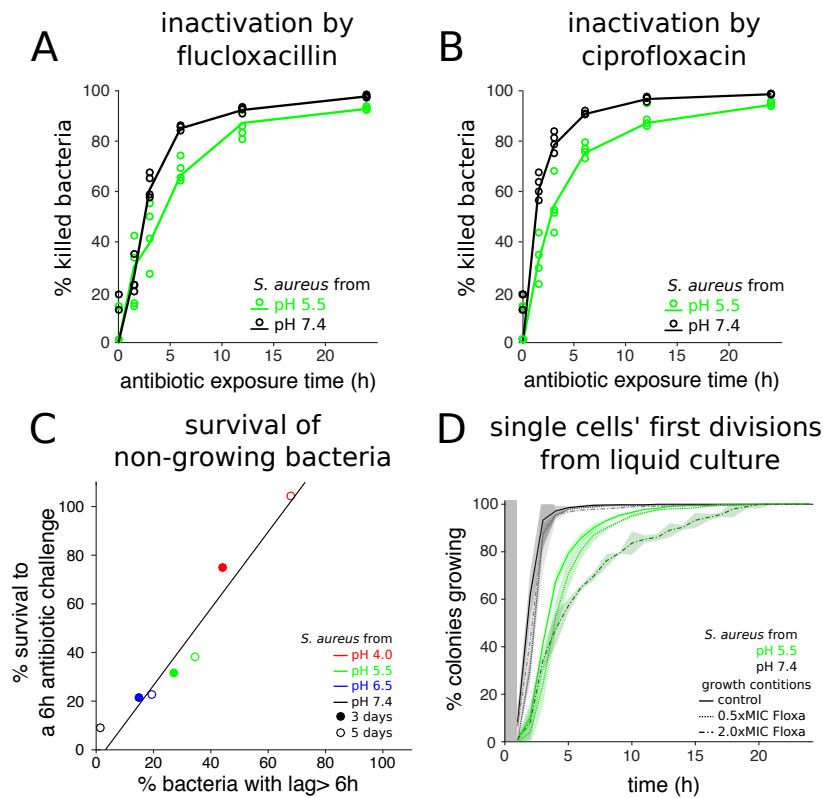

**Figure 4 The proportion of bacteria in lag phase correlates with the proportion of bacteria surviving antibiotics.** **A** and **B** depict the fraction of bacteria that were killed as a function of time upon exposure to the antibiotics flucloxacillin (**A**) and ciprofloxacin (**B**) at 2.5 mg/l concentration (respectively 10 fold and 2.5 fold the minimum inhibitory concentrations). Bacteria were sampled from cultures grown in neutral (pH 7.4) or acidic (pH 5.5) medium. Each data point was calculated as the ratio between the number of colony forming units (CFU) at a specific time point after antibiotic addition and the number of CFU in the inoculum. **C.** The fraction of bacteria in a sample that had a lag time of more than 6 hours upon plating correlated with the fraction of bacteria in the same sample that survived a 6 hour exposure to antibiotics. Cultures were sampled at day 3 or 5 to obtain different proportion of bacteria with a lag time of more than 6 hours. Black line corresponds to linear fit ( $p < 0.001$ ,  $\rho=1$ , Spearman's Rank-Order Correlation). **D.** Exposure to antibiotics increased the lag time of individual bacterial cells, as measured by time-lapse microscopy. This increase was small for bacteria sampled from cultures with neutral pH (grey curves), and more pronounced for bacteria sampled from acidic cultures (green curves). Curves show averages of 3 replicates, and shaded areas depict standard deviation.

**Long lag time confers tolerance to antibiotics.** The appearance of bacteria with a long lag phenotype during the course of an infection prompted us to investigate potential consequences for the effects on antibiotic treatment. Previous studies (32) established that bacteria that are in a state of growth

arrest such as stationary phase are tolerant to antibiotics. We thus quantified antibiotic tolerance of the bacteria that only started growing and dividing a few hours after being transferred to new medium. We tested whether their numbers would correlate with the number of bacteria surviving exposure to the bactericidal antibiotics flucloxacillin (**Fig. 4A**) and ciprofloxacin (**Fig. 4B**) added at concentrations above the minimum inhibitory concentrations. Bacteria preexposed to acidic pH survived antibiotics better and for longer periods than bacteria preexposed to neutral pH (37% vs 9% for 6h exposure to flucloxacillin). The cumulative time kill curves were similar to the cumulative lag time distributions (compare **Fig. 4A, 4B** to **4D**), which is in line with the interpretation that bacteria were tolerant during their lag phase and lost tolerance once they initiated growth. This revealed that after pH 5.5 preexposure, more bacteria survived over an extended period of time than after pH 7.4 preexposure. For different pH preexposures, we observed a correlation between the proportion of bacteria with a lag time over 6h and the proportion of bacteria that survived a 6h flucloxacillin exposure (**Fig. 4C**,  $p < 0.001$ ,  $\rho = 1$ , Spearman's Rank-Order Correlation). Together, these results are consistent with the scenario that after preexposure to an environment which may be encountered during an infection, such as low pH, a fraction of bacteria with a long lag time tolerate antibiotics better.

**Antibiotics increase the proportion of bacteria with long lag.** Our time-lapse microscopy experiments of lag-phase bacteria in the presence of antibiotics revealed that individual bacterial cells were typically only killed after they had initiated growth and underwent a first cell division (see supplementary video 1). This allowed us to quantify their lag times in the

presence of antibiotics, and to ask whether antibiotics had an effect on lag time distributions. We observed that lag time increased with the antibiotic concentration. This effect was subtle for bacteria preexposed to neutral pH and was more pronounced for bacteria preexposed to low pH (**Fig. 4D**). This suggests that exposure to antibiotics *per se* may increase the survival time during which bacteria are tolerant to antibiotics. We observed that the lag time delay was shifted more when the proportion of potentially persisting bacteria was higher due to acidic pH pre-exposure.

## Conclusion

We show that *S. aureus* recovered from abscesses or from *in vitro* systems mimicking *in vivo* conditions displayed marked cell-to-cell variation in lag time. This variation in lag time potentially reflects variation in the physiological state of the bacteria recovered from both infections or after preexposure to the host environment. More specifically, it is plausible that the bacteria that show a long lag time after sampling were in a state of growth-arrest during the infection. This inference is based on our observation that the number of bacteria that showed a long lag time after sampling correlated closely with the number of bacteria in the sample that were tolerant to antibiotics, as would be expected if these bacteria were growth-arrested, i.e. persisters.

In our *in vitro* model, we found that bacteria with a long lag time were continuously produced during growth, and were also enriched during stationary phase. It is important to note that in our model system the bacteria encountered various environmental cues that might trigger entry into a phenotypic state of growth arrest, including acidic pH and increase in bacterial

densities. It is thus not possible to establish whether the acquisition of this state was based on an intrinsic mechanism (33, 34), or by reduced growth similar to that observed in homogeneously tolerant populations (1). In both cases, these previously described mechanisms resulted in less efficient killing by bactericidal antibiotics similar to our observations.

Finally, we show that antibiotics increased the number of bacteria with a long lag time. This emphasizes the importance of carefully evaluating possible side effects of antibiotic treatment. It will be important to investigate whether certain antibiotic treatment regimes may induce tolerance against the antibiotics *per se* (35), and it will be important to identify regimes that are the most effective in controlling heterogenous bacterial populations.



## Materials and Methods

### ***S. aureus* strains and growth conditions**

*S. aureus* strain Cowan I (ATCC 12598) and the patient isolate (CI1016) were grown on Columbia agar plates plus 5% sheep blood (BioMérieux). The stable SCV mutant strain I1b41 (Cowan *hemB::ermB*) (29) was grown on LB agar plates containing 2.5 mg/ml erythromycin and supplemented with 5 % sheep blood if indicated.

For exponential growth control experiments, overnight culture bacteria were grown in Columbia broth in a 37°C shaking incubator. Overnight cultures were diluted 1:100, grown for two hours, and analyzed by automated agar plate imaging after plating (see below).

### ***In vivo* assays**

**Patient:** A 54-year-old patient presenting with a subcutaneous *S. aureus* abscess on the left thigh required surgical debridement. The intraoperatively obtained abscess material was used directly for automated agar plate imaging after obtaining informed consent.

**Mouse:** *S. aureus* Cowan I was grown to logarithmic phase and  $10^8$  CFUs mixed 1:1 with cytodex beads (Sigma) were injected into the flanks of 7 to 9 weeks old female C57BL/6 mice (Janvier Laboratory, France) (27). Mice were sacrificed 5 days post-infection. Abscess pus was harvested, homogenized and directly analyzed by automated agar plate imaging and single-cell time-lapse microscopy as well as plating serial dilutions for bacterial enumeration.

The protocol ZH251/14 was approved by the institutional animal care and use committee of the University of Zurich and all experiments were conducted in approval of the Cantonal Veterinary Office Zurich.

### ***In vitro* assays**

**Eukaryotic cell infections:** The human lung epithelial carcinoma cell line A549 (ATCC CCL-185) was grown in DMEM 4.5 g/mL glucose (Life Technologies) supplemented with 10% FBS (GE Healthcare) and L-glutamine (Life Technologies) and infected with *S. aureus* strain Cowan I at a multiplicity of infection of 1 (14). Three hours after infection, the cells were washed with PBS (DPBS; Life Technologies), and flucloxacillin (Actavis; 1 mg/mL in DMEM) was added to kill any extracellular bacteria. Every day, the washing step was repeated, and fresh medium (containing flucloxacillin 1mg/ml) was added to the host cells. Supernatants were monitored for the absence of any extracellular bacteria by plating. Three days post-infection, host cells were washed again three times with PBS, lysed (0.08% Triton X-100 from Fluka in DPBS), and analyzed by automated agar plate imaging.

**Growth at low pH:** *S. aureus* were inoculated into the defined pH media (pH 4.0, 5.5, 6.5 and 7.4) at a starting OD<sub>600</sub> of 0.2 (14). The media consisted of DMEM (4.5 g/mL glucose, without phenol red, pyruvate, and L-glutamine; Life Technologies) supplemented with 10% FBS and 4 mM of L-glutamine (Life Technologies) and buffers prepared of Na<sub>2</sub>HPO<sub>4</sub> and citric acid (Fluka). pH 7.4 was maintained by 50 mM HEPES (Life Technologies). After incubation at 37°C in 5% CO<sub>2</sub> for three days cultures were analyzed by automated agar plate imaging or single-cell time-lapse microscopy at indicated time points.

## **Automated agar plate imaging**

Bacterial dilutions from the different pre-exposure were plated onto agar plates (Columbia + 5% sheep blood, Biomerieux). Images were acquired every 10 minutes by triggering Canon EOS 1200D reflex cameras with an Arduino Uno board (Arduino) and optocouplers. The whole setup was placed in a 37 °C incubator.

Colonies were segmented in Matlab 2016a (Mathworks) on the green channel using Sauvola local thresholding (36) and through a two-step circular Hough transform (37). Images acquired at 24 hours and 48 hours were first automatically processed with this method and then manually curated. Colony radius change over time was obtained automatically by contouring colonies with a local thresholding.

Lag time was inferred assuming a biphasic growth of colonies: bacteria undergoing a short exponential phase with a radial growth rate of  $0.41 \mu\text{m}\cdot\text{h}^{-1}$  until they reached a diameter of  $130 \mu\text{m}$ , then a linear radial growth rate of  $55 \mu\text{m}\cdot\text{h}^{-1}$ . All parameters were estimated using both microscopic and macroscopic time lapse data (see SI 2).

## **Single-cell time-lapse microscopy**

Agar pads were prepared using a custom-made device made of polyvinyl chloride (see SI 1). Bacterial dilutions were added onto solidified 2% agar (bacteriological grade, BD) with Columbia media (BD) and 5% sheep blood (Life Technologies), then covered with a cover glass. The setup was then placed under microscope at 37°C at the latest 30 minutes after inoculation.

Bright field images were acquired using a fully automated Olympus IX81 inverted microscope at 100x resolution (U-FLN-Oil lens) and the Cellsense

software. Up to 3000 positions were monitored per experiments and the lag time of 200-1000 bacteria was analysed. Images were acquired every 30 minutes starting no later than 30 minutes after initial inoculation. Time to first division was extracted manually using ImageJ software (38).

### **Antibiotic exposure assays**

Bacteria preexposed to acidic conditions were washed and inoculated into DMEM pH 7.4 medium. The DMEM pH 7.4 medium was supplemented with indicated concentrations of flucloxacillin (Actavis) or ciprofloxacin (Bayer). Cultures were incubated at 37°C in 5% CO<sub>2</sub> and culture aliquots were removed at indicated time points to enumerate CFU (surviving bacteria) after washing followed by overnight incubation at 37°C.

The minimal inhibitory concentration (MIC) of flucloxacillin and ciprofloxacin was assessed by microbroth dilution method. A 0.5 McFarland standard (approximately 10<sup>8</sup> cells/ml) was prepared from a fresh *S. aureus* strain Cowan plate and 50 µl of this suspension distributed into the wells of a 96 well plate. Susceptibility testing was performed in either DMEM pH 7.4 or Mueller Hinton Broth and antibiotics incorporated into the medium in serial two-fold dilutions. The 96 well plate was incubated overnight at 37°C and MIC determined by identifying the well containing the lowest antibiotic concentration that inhibits growth. For *S. aureus* strain Cowan, the MIC was 0.25 mg/l for flucloxacillin and 1 mg/l for ciprofloxacin in DMEM pH 7.4, and 0.125 mg/l for flucloxacillin and ciprofloxacin in Mueller Hinton broth.

## Author contributions

---

CV, NL and MH performed *in vitro* experiments. MH and AZ performed mouse experiments. CV and MA analysed data. CV, NL, MH, ASZ, MA designed the project and wrote the manuscript. This work was funded by the SNSF grant 310030\_146295 and 31003A\_176252 (to ASZ), by a CASCADE-FELLOWS PCOFUND-GA-2012-600181 (to CV), by Eawag and ETH.

## References

1. Brauner A, Fridman O, Gefen O, Balaban NQ (2016) Distinguishing between resistance, tolerance and persistence to antibiotic treatment. *Nat Rev Microbiol* 14(5):320–30.
2. Lewis K (2007) Persister cells, dormancy and infectious disease. *Nat Rev Microbiol* 5(1):48–56.
3. Cohen NR, Lobritz MA, Collins JJ (2013) Microbial persistence and the road to drug resistance. *Cell Host Microbe* 13(6):632–642.
4. Fisher RA, Gollan B, Helaine S (2017) Persistent bacterial infections and persister cells. *Nat Rev Microbiol* 15(8):453–464.
5. Proctor RA, Langevelde P Van, Kristjansson M, Maslow JN, Arbeit RD (1995) Persistent and Relapsing Infections Associated with Small-Colony Variants of *Staphylococcus aureus*. *Clin Infect Dis* 20(1):95–102.
6. Thwaites GE, Gant V (2011) Are bloodstream leukocytes Trojan Horses for the metastasis of *Staphylococcus aureus*? *Nat Rev Microbiol* 9(3):215–222.
7. Lowy F (1998) *Staphylococcus aureus* infections. *N Engl J Med* 339:520–532.
8. Libraty DH, Patkar C, Torres B (2012) *Staphylococcus aureus* reactivation osteomyelitis after 75 years. *N Engl J Med* 366(5):481–2.
9. Kahl BC, Becker K, Löffler B (2016) Clinical significance and pathogenesis of staphylococcal small colony variants in persistent infections. *Clin Microbiol Rev* 29(2):401–427.
10. Sendi P, et al. (2006) *Staphylococcus aureus* Small Colony Variants in Prosthetic Joint Infection. *Clin Infect Dis* 43(8):961–967.
11. Proctor RA, et al. (2006) Small colony variants: a pathogenic form of bacteria that facilitates persistent and recurrent infections. *NatRevMicrobiol* 4(1740–1526 (Print)):295–305.
12. Tuchscher L, et al. (2011) *Staphylococcus aureus* phenotype switching: An effective bacterial strategy to escape host immune response and establish a chronic infection. *EMBO Mol Med* 3(3):129–141.
13. Becker K, et al. (2006) Fourier-transform infrared spectroscopic analysis is a powerful tool for studying the dynamic changes in *staphylococcus aureus* small-colony variants. *J Clin Microbiol* 44(9):3274–3278.
14. Leimer N, et al. (2015) Nonstable *Staphylococcus aureus* Small-Colony Variants Are Induced by Low pH and Sensitized to Antimicrobial Therapy by Phagolysosomal Alkalinization. *J Infect Dis*:1–10.
15. Onyango LA, Dunstan RH, Gottfries J, von Eiff C, Roberts TK (2012) Effect of low temperature on growth and ultra-structure of *staphylococcus* spp. *PLoS One* 7(1):1–10.
16. Onyango LA, Hugh Dunstan R, Roberts TK, Macdonald MM, Gottfries J (2013) Phenotypic Variants of *Staphylococci* and Their Underlying Population Distributions Following Exposure to Stress. *PLoS One* 8(10):1–9.
17. Tuchscher L, et al. (2016) *Staphylococcus aureus* develops increased resistance to antibiotics by forming dynamic small colony variants during chronic osteomyelitis. *J Antimicrob Chemother* 71(2):438–448.
18. Vesga O, et al. (1996) *Staphylococcus aureus* small colony variants are induced by the endothelial cell intracellular milieu. *J Infect Dis* 173(3):739–742.
19. Helaine S, et al. (2014) Internalization of *Salmonella* by Macrophages Induces Formation of Nonreplicating Persisters. *Science (80- )* 343(January):204–208.
20. McNamara PJ, Proctor RA (2000) *Staphylococcus aureus* small colony variants, electron transport and persistent infections. *Int J Antimicrob Agents* 14(2):117–122.
21. Edwards AM (2012) Phenotype switching is a natural consequence of *Staphylococcus aureus* replication. *J Bacteriol* 194(19):5404–5412.
22. Coffey JW, De Duve C (1968) Digestive Activity of Lysosomes. *J Biol Chem* 243(June):3255–63.
23. Tranchemontagne ZR, Camire RB, O'Donnell VJ, Baugh J, Burkholder KM (2016) *Staphylococcus aureus* strain USA300 perturbs acquisition of lysosomal enzymes and requires phagosomal acidification for survival inside macrophages. *Infect Immun* 84(1):241–253.
24. Nekoofar MH, et al. (2009) PH of pus collected from periapical abscesses. *Int Endod J*

- 42(6):534–538.
25. Wagner C, Sauermann R, Joukhadar C (2006) Principles of antibiotic penetration into abscess fluid. *Pharmacology* 78(1):1–10.
  26. Bessman AN, Page J, Thomas LJ (1989) In vivo pH of induced soft-tissue abscesses in diabetic and nondiabetic mice. *Diabetes* 38(5):659–662.
  27. Ford C, Hamel J, Stapert D, Yancey R (1989) Establishment of an experimental model of a Staphylococcus aureus abscess in mice by use of dextran and gelatin microcarriers. *J Med Microbiol* 28:259–266.
  28. Simmen H, Jürg B (1993) Analysis of pH and pO<sub>2</sub> in Abscesses, Peritoneal Fluid, and Drainage Fluid in the Presence or Absence of Bacterial Infection During and After Abdominal Surgery. *Am J Surg* 165(July):24–27.
  29. Vaudaux P, et al. (2002) Increased expression of clumping factor and fibronectin-binding proteins by hemB mutants of Staphylococcus aureus expressing small colony variant phenotypes. *Infect Immun* 70(10):5428–5437.
  30. Levin-reisman I, et al. (2010) Automated imaging with ScanLag reveals previously undetectable bacterial growth phenotypes. *Nat Methods* 7(9):737–739.
  31. Barr DA, et al. (2016) Serial image analysis of Mycobacterium tuberculosis colony growth reveals a persistent subpopulation in sputum during treatment of pulmonary TB. *Tuberculosis* 98:110–115.
  32. Conlon BP, et al. (2016) Persister formation in Staphylococcus aureus is associated with ATP depletion. *Nat Microbiol* 1(5). doi:10.1038/nmicrobiol.2016.51.
  33. Cheverton AM, et al. (2016) A Salmonella Toxin Promotes Persister Formation through Acetylation of tRNA. *Mol Cell* 63(1):86–96.
  34. Harms A, Fino C, Sørensen MA, Semsey S (2017) Prophages and Growth Dynamics Confound Experimental Results with Antibiotic-Tolerant Persister Cells. *MBio* 8(6):1–18.
  35. Dörr T, Vulić M, Lewis K (2010) Ciprofloxacin causes persister formation by inducing the TisB toxin in Escherichia coli. *PLoS Biol* 8(2):29–35.
  36. Sauvola J, Pietikäinen M (2000) Adaptive document image binarization. *Pattern Recognit* 33(2):225–236.
  37. Davies ER (1988) A modified Hough scheme for general circle location. *Pattern Recognit Lett* 7(1):37–43.
  38. Rasband W ImageJ, [rsbweb.nih.gov/ij/](http://rsbweb.nih.gov/ij/).
  39. Pirt SJ (1967) A Kinetic Study of the Mode of Growth of Surface Colonies of Bacteria and Fungi. *J Gen Microbiol*:181–197.
